# Supplementary material
Source: publisher figshare collection journal article supplement (https://gsapubs.figshare.com/ndownloader/files/30991282)
Supplement: Supplementary file 1 [file 30991282]

## Sheet: sheet1
x(m)	y(m)	Hop height, Δh (m)	Hop length , Δl (m)	Bed-normal impact velocities, Vin,y (m/s)	Downstream particle velocities Vin,x (m/s)
0.000769902	0.0457772	0.0457772
0.001762	0.0206814	0.0206814
0.00287456	0.0214496	0.0214496
0.00500821	0.00606601	0.00606601
0.00500954	0.00531691			0.734099	0.0071409
0.00539267	0.0186852	0.0186852
0.00734869	0.0205359	0.0205359
0.00892808	0.00362675		0.00511294	0.0141329	0.114596
0.01311	0.00457529	0.00457529
0.0138649	0.0304191	0.0304191
0.0149427	0.0208107	0.0208107
0.0165603	0.00793977			0.0879286	0.277138
0.0188815	0.0226202	0.0226202
0.0191962	0.0269603	0.0269603
0.0192007	0.0209294	0.0209294
0.0217129	0.00346983		0.0185925	0.0119187	0.37185
0.0225039	0.00914858			0.0829092	0.391334
0.0235258	0.000160476		0.0211045	0.0721831	0.422089
0.0265457	0.0314805	0.0314805
0.0317862	0.000665939			0.349684	0.573111
0.0325	0.00834163			0.248119	0.567637
0.0339458	0.00429059			0.0664427	0.0773014
0.0368758	0.00112554		0.0368758
0.0395066	0.00643039			0.172167	0.605719
0.0430618	0.00811838			0.0458435	0.727767
0.0433584	0.00612727			0.229974	0.275892
0.0434121	0.0326977	0.0326977
0.0444472	0.0131438	0.0131438
0.0506268	0.00178335		0.0341038	0.0304695	0.682076
0.0521458	0.0251292	0.0251292
0.0537773	0.00976391			0.098734	0.300179
0.0546797	0.0208082	0.0208082
0.0559722	0.00459469		0.0497478	0.0295801	0.994956
0.0563513	0.00164155		0.0426089	0.0572703	0.852178
0.057414	0.0376245	0.0376245
0.0587059	0.027564	0.027564
0.0588949	0.0115079	0.0115079
0.0592093	0.00650002		0.0445602	0.370248	0.181561
0.0596736	0.0256697	0.0256697
0.0601047	0.00653445			0.189148	0.658256
0.0610541	0.0280436	0.0280436
0.0610734	0.0322386	0.0322386
0.0619213	0.0241195	0.0241195
0.0635044	0.0298801	0.0298801
0.066752	0.038771	0.038771
0.0671491	0.0193318	0.0193318
0.0682542	0.0311779	0.0311779
0.068369	0.00333313		0.023887	0.0213493	0.477739
0.0687762	0.0289833	0.0289833
0.0706729	0.00306901			0.211156	1.36457
0.0713073	0.0188523	0.0188523
0.0723836	0.00172512		0.0699838	0.0660688	1.39968
0.0736106	0.00995139			0.180995	0.61894
0.0737837	0.0260189	0.0260189
0.0754832	0.00494234		0.016274	0.0246287	0.274371
0.0760501	0.033643	0.033643
0.0773773	0.00970271		0.0769707	0.260427	0.500295
0.0785462	0.00908355		0.0771435	0.229527	0.991189
0.0789576	0.00781727	0.00781727
0.0790186	0.00935988	0.00935988
0.0801027	0.0362015	0.0362015
0.0815132	0.00561016	0.00561016
0.0832122	0.0209506	0.0209506
0.0842627	0.00220679	0.00220679
0.0845737	0.00137014		0.0826604	0.0578295	1.65321
0.0849431	0.0221314	0.0221314
0.085561	0.0278645	0.0278645
0.0860766	0.00481894			0.0968533	1.58194
0.0863361	0.00622502			0.407825	1.63489
0.0867052	0.00191403		0.00597299	0.00243688	0.0389272
0.0874806	0.00300564		0.075936	0.0307952	1.51872
0.0883459	0.00819339		0.0319946	0.129664	0.306049
0.0892943	0.0300694	0.0300694
0.091074	0.0359781	0.0359781
0.091121	0.0161269	0.0161269
0.0914533	0.00537352			0.16406	1.28609
0.0919259	0.0270474	0.0270474
0.0942694	0.0429305	0.0429305
0.0945187	0.0383871	0.0383871
0.0971895	0.0362238	0.0362238
0.0972908	0.02624	0.02624
0.0989573	0.0166871	0.0166871
0.0990516	0.0116178	0.0116178
0.0999414	0.0292405	0.0292405
0.0999478	0.0229377	0.0229377
0.100692	0.0353955	0.0353955
0.102498	0.00720873			0.431542	1.50275
0.102882	0.0234408	0.0234408
0.103004	0.0307742	0.0307742
0.103044	0.0008766		0.00139316	0.0183358	0.0278631
0.105095	0.00347085		0.00434576
0.106975	0.0147778	0.0147778
0.107207	0.0235563	0.0235563
0.109199	0.000127594			0.438896	2.10708
0.109529	6.46e-05		0.000251502	0.00088711	0.00391107
0.109585	0.000191275	0.000191275
0.109634	0.0001883	0.0001883
0.109668	0		0.000447153	0.00296063	0.00894306
0.109672	5.17e-05		0.000472993	0.37267	2.08559
0.109767	0.000355824	0.000355824
0.109865	0.000385794	0.000385794
0.112517	0.0314485	0.0314485
0.11331	0.0168049	0.0168049
0.113767	0.0168312	0.0168312
0.114127	0.0284492	0.0284492
0.114708	0.0341748	0.0341748
0.114764	0.0403472	0.0403472
0.115296	0.0153586	0.0153586
0.115941	0.0168449	0.0168449
0.116194	0.0359135	0.0359135
0.116796	0.0316466	0.0316466
0.116893	0.0550524	0.0550524
0.118322	0.00211711		0.0299766	0.416412	0.367494
0.119121	0.0329717	0.0329717
0.119881	0.0274212	0.0274212
0.120629	0.0254361	0.0254361
0.121705	0.00752715		0.00819093	0.00239512	0.0865405
0.122004	0.0239825	0.0239825
0.122566	0.0174118	0.0174118
0.123111	0.00536728		0.12174	0.160347	0.587222
0.12423	0.0313809	0.0313809
0.124775	0.0360226	0.0360226
0.125087	0.0269674	0.0269674
0.125156	0.00912979	0.00912979
0.125231	0.0398718	0.0398718
0.126828	0.0187087	0.0187087
0.12687	0.00479245	0.00479245
0.127138	0.0131523	0.0131523
0.127749	0.00572858		0.0843904	0.16435	0.546638
0.127842	0.0206491	0.0206491
0.128231	0.00941712	0.00941712
0.129234	0.0251453	0.0251453
0.129329	0.0112601	0.0112601
0.129367	0.0068603			0.0965474	1.04832
0.129978	0.00409553		0.106452	0.0920586	0.741228
0.130033	0.00854862		0.00347277	0.00343915	0.0579495
0.130103	0.00482714			0.321223	2.40985
0.131053	0.00469851		0.0915459	0.3093	0.846961
0.131467	0.0260183	0.0260183
0.131546	0.0187471	0.0187471
0.131565	0.00145844		0.126555	0.207662	0.99669
0.131635	0.00489429	0.00489429
0.132289	0.00380943		0.0368552	0.00645963	0.592616
0.132469	0.011704	0.011704
0.134211	0.0177917	0.0177917
0.135823	0.00300713		0.129745	0.17272	0.557021
0.137616	0.00911005	0.00911005
0.138986	0.0324261	0.0324261
0.141482	0.0671591	0.0671591
0.142064	0.0395706	0.0395706
0.142426	0.00887959		0.0323895	0.0279061	0.0817352
0.144462	0.0290335	0.0290335
0.145253	0.0039093		0.0584022	0.0329533	1.47167
0.146459	0.0117226	0.0117226
0.147674	0.0317603	0.0317603
0.149029	0.00478435			0.177353	1.42888
0.150136	0.00645459		0.0163082	0.0420839	0.190874
0.152282	0.022727	0.022727
0.15237	0.0362981	0.0362981
0.152404	0.0167132	0.0167132
0.152701	0.0367968	0.0367968
0.152965	0.00316205		0.00771271	0.014945	0.154254
0.153056	0.0198346	0.0198346
0.154406	0.00505192			0.302703	1.11593
0.15464	0.028127	0.028127
0.15602	0.00623489		0.140087	0.209044	1.14126
0.156622	0.0283557	0.0283557
0.156632	0.00829577	0.00829577
0.156853	0.00461444		0.153918	0.35034	1.4382
0.157233	0.00645674			0.0863423	1.19095
0.157275	0.0400023	0.0400023
0.157993	0.025986	0.025986
0.159318	0.00748893		0.158205	0.302375	2.81467
0.159675	0.0444249	0.0444249
0.160377	0.0079096		0.117315	0.178431	0.932188
0.160951	0.00693594	0.00693594
0.162062	0.00906944			0.470736	2.87155
0.162853	0.00928311			0.170172	0.572832
0.163448	0.0126626	0.0126626
0.163455	0.00905815		0.00677706	0.167074	0.817789
0.163525	0.064938	0.064938
0.164931	0.0042027	0.0042027
0.164962	0.0062142		0.0148257	0.0124941	0.229817
0.165243	0.0263151	0.0263151
0.165598	0.00564107			0.224077	0.99315
0.16669	0.00638019			0.153949	1.08057
0.168249	0.00262753			0.360046	1.28964
0.16858	0.0060079		0.0261539	0.0370277	0.271299
0.17147	0.0328016	0.0328016
0.175048	0.0259736	0.0259736
0.175493	0.0525357	0.0525357
0.175652	0.00437489			0.716068	2.42821
0.176165	0.0269269	0.0269269
0.179022	0.00422261	0.00422261
0.179942	0.00417135			0.374221	1.31049
0.182107	0.0022536		0.165706
0.182627	0.00739089		0.122523	0.0067906	2.21655
0.18375	0.00401577			0.739209	0.410049
0.183897	0.00624044	0.00624044
0.185057	0.0320828	0.0320828
0.186823	0.026896	0.026896
0.186948	0.00697512		0.153002	0.0883752	2.50534
0.187917	0.0328304	0.0328304
0.188089	0.0171262	0.0171262
0.188149	0.00486812			0.638573	0.708978
0.188183	0.00411934		0.100702
0.188833	0.000313725			0.386931	3.70626
0.189338	0.00762913			0.317648	2.63492
0.191466	0.00484078	0.00484078
0.191973	0.0270652	0.0270652
0.192494	0.00817966	0.00817966
0.193589	0.00658402			0.291005	2.70341
0.193684	0.00797334		0.191298	0.296634	0.859227
0.195532	0.00657358		0.173028	0.0210607	2.25414
0.197463	0.102226	0.102226
0.197778	0.00496968		0.0700287	0.147789	0.561923
0.197947	0.0694228	0.0694228
0.198504	0.0181982	0.0181982
0.198907	0.0092562			0.242788	3.23551
0.199016	0.00752995		0.0340539	0.000465853	0.321738
0.20102	0.00700773		0.199903	0.527965	1.5685
0.202105	0.00112819		0.129722	0.425022	0.89114
0.202618	0.00793752		0.165742	0.152391	0.627177
0.202773	0.0067999		0.143164	0.176861	0.791076
0.202998	0.00434163		0.0530151	0.144146	0.556001
0.203095	0.00581432		0.129484	0.243832	0.418089
0.20347	0.00426541		0.0466166	0.00698068	0.932333
0.206129	0.0016315		0.0878063	0.051424	0.823957
0.206258	0.0094942	0.0094942
0.20643	0.00247904		0.0706069	0.0253622	0.844059
0.20704	0.00609555			0.120322	0.655728
0.207637	0.0473158	0.0473158
0.208584	0.0708618	0.0708618
0.209171	0.004838		0.0562053	0.251586	1.28435
0.209232	0.0121354	0.0121354
0.209523	0.0203916	0.0203916
0.210154	0.00358451	0.00358451
0.21087	0.0495237	0.0495237
0.211142	0.0261173	0.0261173
0.212842	0.114311	0.114311
0.214349	0.0341262	0.0341262
0.214596	0.0335646	0.0335646
0.215924	0.00782651		0.143548	0.212706	0.916123
0.217242	0.0148264	0.0148264
0.217503	0.0151909	0.0151909
0.217759	0.0232008	0.0232008
0.218662	0.00215259		0.0125333	0.00527256	0.23202
0.21982	0.00465606		0.0448643	0.0296995	0.897285
0.221318	2.72e-05			0.789818	1.77758
0.22256	0.0348017	0.0348017
0.222748	0.00384915			0.132428	4.29865
0.224115	0.0149664	0.0149664
0.224721	0.00746569			0.375915	3.05868
0.225291	0.00443859		0.0937262	0.00199665	0.967435
0.227746	0.0148363	0.0148363
0.22838	0.0216438	0.0216438
0.229182	0.0767767	0.0767767
0.229301	0.0250136	0.0250136
0.230003	0.023572	0.023572
0.230502	0.0136151	0.0136151
0.232984	0.00576598			0.652737	2.74422
0.235628	0.0456112	0.0456112
0.236311	0.00393639	0.00393639
0.236739	0.00988282			0.270758	0.959719
0.237004	0.00253975		0.106842	0.0624101	0.827707
0.238238	0.018064	0.018064
0.23862	0.00662371	0.00662371
0.239362	0.00396237		0.0403461	0.0381683	0.36267
0.239497	0.0105163	0.0105163
0.239622	0.00300002		0.0544807	0.0182992	0.607779
0.239845	0.0665193	0.0665193
0.239931	0.0116918	0.0116918
0.239992	0.00994379		0.231556	0.317578	1.28577
0.240138	0.0019495		0.107849	0.0375991	2.1053
0.240806	0.0188284	0.0188284
0.241812	0.0198571	0.0198571
0.242132	0.0128195	0.0128195
0.242993	0.0287612	0.0287612
0.243407	0.0385386	0.0385386
0.244676	0.00552039		0.0248563	0.00539217	0.432287
0.244777	0.00472779		0.0761972	0.0745082	0.490623
0.244893	0.0136431	0.0136431
0.245016	0.0014857			0.387376	2.53209
0.245122	0.0214324	0.0214324
0.245751	0.0268977	0.0268977
0.246764	0.0406089	0.0406089
0.246801	0.00289389		0.232729	0.371648	0.835974
0.24718	0.00657025		0.238252	0.195956	2.04299
0.249084	0.00547454		0.0399132	0.00193519	0.404439
0.250519	0.0354687	0.0354687
0.251688	0.0233443	0.0233443
0.252361	0.0262899	0.0262899
0.253667	0.015428	0.015428
0.254142	0.0181651	0.0181651
0.256346	0.029156	0.029156
0.256374	0.0346942	0.0346942
0.256933	0.00321458			0.0534447	0.476362
0.257203	0.043527	0.043527
0.257825	0.0495688	0.0495688
0.258321	0.00314888	0.00314888
0.259358	0.0267781	0.0267781
0.259657	0.00506163		0.0992803	0.0595456	1.65193
0.259824	0.00312184		0.0720149	0.00566485	0.992203
0.259897	0.00580937		0.228111	0.017173	3.23637
0.26068	0.0135465	0.0135465
0.261877	0.0156523	0.0156523
0.262199	0.0178476	0.0178476
0.263525	0.0194709	0.0194709
0.263611	0.00657564			0.135051	1.37756
0.266303	0.00435337		0.0410117	0.0017044	0.820234
0.266481	0.00670767	0.00670767
0.266803	0.00654894		0.250243	0.406941	1.59961
0.267518	0.0306565	0.0306565
0.268157	0.0316546	0.0316546
0.268396	0.0185209	0.0185209
0.271012	0.0276868	0.0276868
0.273215	0.0237345	0.0237345
0.275186	0.00931135		0.0864193	0.100656	0.740648
0.2778	0.0458124	0.0458124
0.279531	0.0841499	0.0841499
0.279635	0.0208439	0.0208439
0.280596	0.00222194		0.250178	0.0494971	1.86351
0.280901	0.00848294	0.00848294
0.281092	0.0244671	0.0244671
0.281296	0.00496186	0.00496186
0.281793	0.0057608		0.0349922	0.18854	0.0313362
0.282141	0.00295488		0.0800362	0.102292	1.1844
0.282437	0.0181499	0.0181499
0.284192	0.0283379	0.0283379
0.284845	0.00584718		0.0822275	0.139447	0.854266
0.288577	0.00214371		0.0450972	0.0178633	0.437058
0.289484	0.0209176	0.0209176
0.291459	0.00434312		0.240832
0.293424	0.0409182	0.0409182
0.293513	0.028448	0.028448
0.293629	0.0331777	0.0331777
0.295655	0.0216672	0.0216672
0.296036	0.00470933		0.0566734	0.0399669	0.591086
0.296853	0.0134164	0.0134164
0.297559	0.00866663		0.293833	0.189791	0.687324
0.297773	0.026456	0.026456
0.300275	0.029625	0.029625
0.300305	0.00834872		0.117678	0.183437	0.873218
0.302	0.0349241	0.0349241
0.302497	0.0090396		0.199999
0.303758	0.00785528		0.244633	0.126211	1.28768
0.305232	0.00979851		0.10246	0.0696616	0.885334
0.30626	0.0254513	0.0254513
0.307372	0.0289329	0.0289329
0.309685	0.0238366	0.0238366
0.309704	0.0083651	0.0083651
0.309709	0.00879965	0.00879965
0.311881	0.0348705	0.0348705
0.312635	0.015422	0.015422
0.312767	0.00343893	0.00343893
0.312842	0.00282285	0.00282285
0.314275	0.00544814		0.0694979	0.0451978	0.513718
0.318005	0.00646577	0.00646577
0.318315	0.00618362			0.155078	1.44851
0.318666	0.0761121	0.0761121
0.318862	0.00474134		0.121085	0.163773	0.635683
0.321006	0.0125117	0.0125117
0.321034	0.0411246	0.0411246
0.32168	0.00256118		0.077004	0.0600306	1.32735
0.323398	0.00474052		0.171092	0.0325841	1.42699
0.324876	0.0333455	0.0333455
0.325053	0.0170615	0.0170615
0.325462	0.050614	0.050614
0.325537	0.0127905	0.0127905
0.326139	0.00399071	0.00399071
0.326278	0.00872317		0.171872	0.146062	1.00895
0.32645	0.00602454		0.0792696	0.0109141	1.58539
0.326851	0.0119012	0.0119012
0.328112	0.0231461	0.0231461
0.328525	0.00608199	0.00608199
0.328629	0.0123892	0.0123892
0.329891	0.00413653		0.0635882	0.0165067	0.971911
0.33053	0.00239987		0.0419533	0.00230226	0.536991
0.331578	0.00751984	0.00751984
0.332468	0.00254845		0.0928455	0.0125862	1.75356
0.334588	0.029146	0.029146
0.334633	0.00341385		0.0785803	0.0568007	1.47364
0.334685	0.00728217	0.00728217
0.334988	0.00238665	0.00238665
0.335302	0.0327368	0.0327368
0.337742	0.0144688	0.0144688
0.337782	0.0353091	0.0353091
0.338165	0.0139136	0.0139136
0.339404	0.0164839	0.0164839
0.340651	0.013418	0.013418
0.341908	0.0234522	0.0234522
0.343254	0.0118234	0.0118234
0.343584	0.0201782	0.0201782
0.344138	0.0906558	0.0906558
0.344307	0.00688368		0.018029	0.286309	1.09854
0.344449	0.052497	0.052497
0.34461	0.0056096		0.13757	0.200626	1.48491
0.344878	0.0198534	0.0198534
0.346071	0.00732721		0.177822	0.328972	0.749938
0.346506	0.00472216		0.150974	0.0936198	0.914892
0.347384	0.0278456	0.0278456
0.347601	0.00745735		0.160653	0.199902	1.04589
0.34765	0.00508399		0.167708	0.266685	1.39435
0.348399	0.044083	0.044083
0.348498	0.0297154	0.0297154
0.349055	0.00944654		0.0737177	0.11951	0.728407
0.350427	0.0219442	0.0219442
0.351418	0.0338514	0.0338514
0.352527	0.0389659	0.0389659
0.352551	0.00862163		0.298774	0.098498	1.83742
0.353478	0.00767743		0.186788	0.218146	1.08239
0.354157	0.00590291		0.0374385	0.0275852	0.38943
0.354895	0.0340586	0.0340586
0.355225	0.0355633	0.0355633
0.35671	0.0107415	0.0107415
0.356858	0.00347887		0.157951	0.536625	0.970833
0.357586	0.0294274	0.0294274
0.358941	0.0189735	0.0189735
0.361199	0.046031	0.046031
0.361391	0.0213069	0.0213069
0.36324	0.0410859	0.0410859
0.364044	0.00286527		0.163024	0.17317	1.58726
0.365118	0.00449906	0.00449906
0.365306	0.0191118	0.0191118
0.365354	0.00747784			0.277395	1.44865
0.365743	0.0293128	0.0293128
0.366221	0.00518893	0.00518893
0.366691	0.0272221	0.0272221
0.367075	0.0262691	0.0262691
0.36774	0.0058695		0.0717046	0.0184276	0.52554
0.368269	0.00280199		0.261158	0.785023	1.46245
0.368356	0.0171055	0.0171055
0.370084	0.0105892	0.0105892
0.370289	0.0425819	0.0425819
0.370498	0.00486156		0.145777	0.165733	0.855246
0.371087	0.0375579	0.0375579
0.373611	0.00300432	0.00300432
0.374017	0.040186	0.040186
0.374135	0.0389446	0.0389446
0.374677	0.0370286	0.0370286
0.376049	0.00542472		0.0809718	0.159865	0.707965
0.376315	0.0986673	0.0986673
0.378347	0.033154	0.033154
0.378452	0.00867065	0.00867065
0.378899	0.0104881	0.0104881
0.379062	0.00603754	0.00603754
0.379266	0.00216033		0.119441	0.0192302	2.38883
0.379291	0.0131126	0.0131126
0.379304	0.00161367			0.18839	1.285
0.379816	0.00313389		0.0260169
0.380999	0.00658755			0.152715	1.64759
0.381774	0.00371922		0.16113	0.028546	0.90386
0.382149	0.0863605	0.0863605
0.382673	0.00770282		0.055571	0.0084977	1.11142
0.383118	0.0181887	0.0181887
0.384162	0.00657902		0.147423	0.183597	1.2607
0.38516	0.00824993		0.158182	0.00991057	1.63085
0.386048	0.0033027		0.0677321	0.135887	0.970783
0.387014	0.00872779			0.0366788	1.45921
0.387128	0.023247	0.023247
0.389384	0.00488741		0.333411	0.5736	1.57488
0.391423	0.0387425	0.0387425
0.391503	0.03801	0.03801
0.392496	0.00364679		0.369138	0.286707	0.542495
0.393277	0.0338934	0.0338934
0.393746	0.0460351	0.0460351
0.394245	0.011403	0.011403
0.394399	0.00290641		0.0645077	0.0302145	0.893357
0.395969	0.0537035	0.0537035
0.39598	0.00240464		0.0654503	0.00587745	0.65871
0.397033	0.0415216	0.0415216
0.400249	0.0167073	0.0167073
0.400999	0.0863765	0.0863765
0.401872	0.0308119	0.0308119
0.401886	0.00141418		0.195456	0.0935643	0.911557
0.402635	0.0074803		0.3875	0.433314	1.36094
0.404757	0.00911344			0.168602	0.838227
0.406077	0.00162585		0.222327	0.0451769	4.28013
0.406565	0.0034036		0.12172	0.0905572	0.765227
0.407274	0.0173885	0.0173885
0.408558	0.00284164			0.0648344	0.657913
0.40888	0.00960245	0.00960245
0.409219	0.00173082		0.127078	0.0861345	0.603152
0.40958	0.0250969	0.0250969
0.409789	0.0288063	0.0288063
0.410019	0.0120714	0.0120714
0.410091	0.0355375	0.0355375
0.41013	0.00950047	0.00950047
0.410657	0.0245464	0.0245464
0.411135	0.00437313		0.0968601	0.1223	0.644719
0.411441	0.0141059	0.0141059
0.412741	0.00618716		0.209271	0.0565328	1.25465
0.414451	0.0284142	0.0284142
0.414479	0.0392679	0.0392679
0.414762	0.00399295		0.328686	0.42434	1.67457
0.416424	0.131413	0.131413
0.417783	0.0146158	0.0146158
0.419268	0.00866168		0.100406	0.157352	0.580911
0.420441	0.00916475	0.00916475
0.42225	0.0229985	0.0229985
0.423882	0.00657625		0.100484	0.130728	0.891829
0.424035	0.0239446	0.0239446
0.425455	0.0065739		0.259857	0.371776	1.22238
0.425769	0.00571612			0.650369	4.80602
0.426278	0.0202808	0.0202808
0.427106	0.0297354	0.0297354
0.427786	0.0345445	0.0345445
0.428574	0.0192379	0.0192379
0.428993	0.0229386	0.0229386
0.429331	0.010321	0.010321
0.429702	0.00794053	0.00794053
0.430961	0.0176141	0.0176141
0.432095	0.0225702	0.0225702
0.433319	0.0319026	0.0319026
0.435544	0.00634675		0.067804	0.065114	0.533276
0.436459	0.0386039	0.0386039
0.436642	0.00789147		0.307275	0.0859859	1.12947
0.436675	0.00396747		0.0574088	0.0757145	0.150629
0.439415	0.0031468		0.0712968	0.0288807	0.767567
0.439568	0.00798854	0.00798854
0.439766	0.0124071	0.0124071
0.439946	0.0131352	0.0131352
0.440124	0.0182917	0.0182917
0.442169	0.0165026	0.0165026
0.443178	0.0178626	0.0178626
0.443586	0.0147953	0.0147953
0.444904	0.0167753	0.0167753
0.445378	0.00692019	0.00692019
0.445853	0.00748866		0.186196	0.0737854	0.958465
0.446262	0.0430725	0.0430725
0.449198	0.00560116		0.122748	0.0486658	0.793032
0.449617	0.00516185			0.0780648	0.909573
0.450438	0.112806	0.112806
0.451481	0.018908	0.018908
0.451719	0.0252943	0.0252943
0.452369	0.0454806	0.0454806
0.452411	0.0113296	0.0113296
0.455309	0.0285825	0.0285825
0.455443	0.00593108	0.00593108
0.455519	0.00944619			0.422326	0.034594
0.455581	0.00772943	0.00772943
0.456253	0.00429587		0.411537	1.27602	2.13724
0.45638	0.0355671	0.0355671
0.456473	0		0.077169	0.0383358	1.21952
0.458364	0.0044938		0.0723166	0.231848	0.915126
0.464928	0.00863865		0.117327	0.014329	0.992286
0.46534	0.0308723	0.0308723
0.46543	0.00426285		0.0575686	0.0745138	0.517257
0.465483	0.044809	0.044809
0.466442	0.00292796		0.109584	0.0741409	0.914995
0.466505	0.0390055	0.0390055
0.466799	0.0215837	0.0215837
0.466885	0.0264921	0.0264921
0.467172	0.00232676		0.16011	0.045724	1.39773
0.4674	0.00611699		0.227832	0.151783	0.763319
0.467585	0.0664591	0.0664591
0.467903	0.0114873	0.0114873
0.468666	0.0232628	0.0232628
0.468923	0.00398897		0.128215	0.371625	0.73655
0.471223	0.0182786	0.0182786
0.4722	0.0182713	0.0182713
0.47264	0.00434026		0.310577	0.350296	0.716987
0.472783	0.00403641		0.0361084	0.0122669	0.61702
0.474349	0.0182557	0.0182557
0.475127	0.0156535	0.0156535
0.475176	0.00669719	0.00669719
0.475325	0.0261558	0.0261558
0.475534	0.00327885		0.318301	0.0784018	2.02124
0.47566	0.0119789	0.0119789
0.4771	0.0066673		0.12945	0.208925	1.13745
0.477197	0.0119865	0.0119865
0.477368	0.0128232	0.0128232
0.478797	0.012709	0.012709
0.479666	0.00208801		0.117505	0.259296	1.76829
0.480084	0.0281263	0.0281263
0.480742	0.0382319	0.0382319
0.482573	0.00844412		0.0714382	0.00121009	0.887322
0.483292	0.0369012	0.0369012
0.485338	0.0308728	0.0308728
0.48578	0.00560796		0.293498	0.0612537	2.14657
0.485886	0.00493899	0.00493899
0.488832	0.00923695	0.00923695
0.489541	0.00928347		0.125498	0.102159	1.18471
0.490369	0.018229	0.018229
0.492192	0.00221686		0.0962118	0.186251	0.775325
0.494514	0.00630789	0.00630789
0.495627	0.0191108	0.0191108
0.497581	0.0191049	0.0191049
0.497817	0.00872891		0.0481998	0.155474	1.11295
0.498282	0.0205341	0.0205341
0.498447	0.0035922		0.318669	0.19623	1.14057
0.499769	0.0359942	0.0359942
0.50017	0.0249186	0.0249186
0.500194	0.00710554		0.093744	0.0786377	0.886058
0.50052	0.026064	0.026064
0.500544	0.00513717		0.108049	0.169393	0.734047
0.503305	0.00894929		0.327653	0.254825	0.730462
0.503453	0.0178069	0.0178069
0.503496	0.0142255	0.0142255
0.503852	0.0261148	0.0261148
0.504056	0.0103662	0.0103662
0.504205	0.0389196	0.0389196
0.504631	0.00678018	0.00678018
0.506322	0.00274282		0.139329	0.0801312	0.936638
0.508266	0.0209916	0.0209916
0.509676	0.017301	0.017301
0.509769	0.00374706		0.0369861	0.00578713	0.739722
0.509882	0.00473042		0.249985
0.510427	0.0239553	0.0239553
0.511263	0.0276082	0.0276082
0.512145	0.0341001	0.0341001
0.514491	0.031055	0.031055
0.51487	0.0476279	0.0476279
0.516086	0.00768377	0.00768377
0.516826	0.00361644		0.119694	0.0822598	1.22489
0.51865	0.00676856		0.302726	0.114789	1.20596
0.519219	0.0101841	0.0101841
0.519796	0.017457	0.017457
0.520102	0.00470007		0.134941	0.0709972	2.69882
0.52021	0.016383	0.016383
0.520638	0.00943287	0.00943287
0.521076	0.0108053	0.0108053
0.52119	0.00863702		0.155836	0.162788	0.909505
0.521599	0.00835563		0.257987	0.292729	1.47106
0.521661	0.0161605	0.0161605
0.522372	0.0273483	0.0273483
0.522779	0.0245952	0.0245952
0.524826	0.00802552		0.249639	0.221705	0.58397
0.526224	0.026227	0.026227
0.527184	0.0225454	0.0225454
0.528125	0.00520028	0.00520028
0.528407	0.0168885	0.0168885
0.5297	0.00554744			0.771518	1.90041
0.530038	0.0247159	0.0247159
0.530843	0.00577207			0.575449	2.06114
0.531491	0.00994371		0.160993	0.16624	1.14285
0.532702	0.0220412	0.0220412
0.533505	0.00559646		0.152506	0.103063	0.877484
0.533759	0.00646691	0.00646691
0.53525	0.0135927	0.0135927
0.535621	0.0157285	0.0157285
0.536193	0.00867858		0.0383765	0.00100663	0.767529
0.538505	0.0279857	0.0279857
0.538571	0.00460804		0.0731409	0.0339969	0.881143
0.541715	0.0202228	0.0202228
0.542586	0.0181344	0.0181344
0.544782	0.0165949	0.0165949
0.544911	0.028242	0.028242
0.545459	0.0343558	0.0343558
0.547339	0.00417853		0.514839	0.172893	1.39941
0.547808	0.00455093		0.153409	0.0720487	0.928655
0.54804	0.0120489	0.0120489
0.548657	0.00610433		0.255904	0.16356	2.59642
0.548927	0.00843511		0.14417	0.177317	0.785037
0.54981	0.0388038	0.0388038
0.549811	0.00515831			0.117238	2.96386
0.550653	0.0282029	0.0282029
0.55105	0.00913165		0.0955308	0.103644	1.18636
0.551624	0.00198669		0.0453012	0.0104825	0.702169
0.551916	0.0357417	0.0357417
0.552824	0.00877382			0.084826	0.582915
0.552844	0.00845134	0.00845134
0.552949	0.00405785		0.0758493	0.104332	0.947746
0.553504	0.00489635		0.00188034	0.0373356	0.738424
0.553694	0.0377503	0.0377503
0.553763	0.00376066		0.0439935	0.0101039	0.658267
0.553884	0.0481726	0.0481726
0.554028	0.0738939	0.0738939
0.557015	0.00875166		0.13306	0.159433	0.899857
0.557471	0.0131113	0.0131113
0.557605	0.0339983	0.0339983
0.557657	0.0283601	0.0283601
0.55769	0.0407348	0.0407348
0.558641	0.00316006		0.152076	0.018929	1.18995
0.560845	0.0365174	0.0365174
0.561117	0.0242741	0.0242741
0.56147	0.0218434	0.0218434
0.561583	0.0544008	0.0544008
0.56225	0.021605	0.021605
0.562668	0.0537902	0.0537902
0.564228	0.0232693	0.0232693
0.564751	0.00440043		0.106387	0.0461897	0.83207
0.567063	0.00273707		0.033442	0.000851606	0.668839
0.567223	0.00293888		0.0666786	0.0501097	0.769521
0.567486	0.0192942	0.0192942
0.567722	0.00499297		0.050896
0.568009	0.00452028			0.327347	0.962538
0.568748	0.054054	0.054054
0.570112	0.00423968			0.0376444	1.02432
0.570218	0.00376376		0.483882	0.52615	1.47302
0.570565	0.0168711	0.0168711
0.572387	0.00610505		0.0997467	0.032333	1.77027
0.572977	0.0217399	0.0217399
0.574755	0.0185625	0.0185625
0.575846	0.00798674		0.238292	0.392429	1.29166
0.576494	0.003924		0.19472	0.0751953	1.20816
0.57763	0.00653351		0.0950571	0.141183	0.8476
0.577708	0.00912789		0.46853	0.411011	1.49683
0.579138	0.00680024		0.111737	0.185299	0.782006
0.579179	0.0060473		0.225022	0.00694231	4.00568
0.579943	0.0383612	0.0383612
0.580336	0.00743272		0.23383	0.0994869	2.8114
0.580601	0.0353172	0.0353172
0.581961	0.00370519			0.62468	3.01789
0.582171	0.00301673	0.00301673
0.582778	0.040393	0.040393
0.584097	0.00457694		0.181462	0.318116	1.09661
0.587707	0.00873279	0.00873279
0.587842	0.00713435	0.00713435
0.587908	0.0182965	0.0182965
0.590012	0.0179423	0.0179423
0.590365	0.00310854		0.113009	0.0382211	1.00616
0.590678	0.0124389	0.0124389
0.590967	0.00656504		0.171699	0.230635	0.47943
0.591183	0.00448776		0.461205	0.18396	1.4274
0.591729	0.00585359	0.00585359
0.591918	0.00594326	0.00594326
0.593612	0.0161827	0.0161827
0.594046	0.0109306	0.0109306
0.594049	0.015671	0.015671
0.594597	0.0197133	0.0197133
0.595464	0.00918597	0.00918597
0.595869	0.014114	0.014114
0.595872	0.0205009	0.0205009
0.596095	0.00710572			0.361108	1.24227
0.597022	0.0366441	0.0366441
0.597179	0.0314678	0.0314678
0.597318	0.00666702		0.299759	0.291926	0.897306
0.598107	0.0091998		0.297802	0.102879	1.74114
0.598801	0.0107658	0.0107658
0.600298	0.0436719	0.0436719
0.600324	0.00128993		0.120658	0.016778	1.16875
0.601473	0.0184645	0.0184645
0.603526	0.00995013		0.524979	0.186881	0.720797
0.604092	0.0162906	0.0162906
0.604466	0.00707375		0.158613	0.0215209	2.90561
0.605052	0.00779131			0.356213	1.28359
0.605178	0.00401565		0.15598	0.267936	0.206275
0.605445	0.00450341	0.00450341
0.605721	0.00765019		0.0695284	0.0267461	1.02974
0.60801	0.00767874			0.0840541	0.754775
0.608428	0.00531479		0.108234	0.0627311	1.11168
0.609946	0.00502332		0.142774	0.0278252	1.02532
0.610304	0.0402695	0.0402695
0.610336	0.0186272	0.0186272
0.611691	0.00827088		0.108386	0.255475	0.789924
0.611709	0.00220197		0.0446458	0.010702	0.892915
0.611767	0.012997	0.012997
0.612042	0.00966039		0.0139349	0.102413	0.290661
0.612491	0.0302474	0.0302474
0.614111	0.00850103	0.00850103
0.61527	0.0252836	0.0252836
0.615294	0.0050775		0.0624267	0.00771531	0.840351
0.615575	0.00790713		0.421985	0.229763	2.59968
0.616318	0.0361769	0.0361769
0.616826	0.00529079		0.0782548	0.0130495	0.498158
0.617592	0.0514941	0.0514941
0.617732	0.00454209		0.275137	0.110577	0.805886
0.6183	0.00459206		0.0704916	0.0252795	0.875549
0.618333	0.0180511	0.0180511
0.621741	0.00869658		0.612642	0.101125	1.13248
0.622664	0.0227715	0.0227715
0.624025	0.0169826	0.0169826
0.625115	0.00460466			0.544894	0.771266
0.625808	0.0170549	0.0170549
0.628449	0.00537737		0.075499	0.0937139	0.847484
0.62859	0.0147881	0.0147881
0.6287	0.00389849			0.427366	1.71148
0.628932	0.0104101	0.0104101
0.629563	0.0056315		0.24689	0.214995	2.54578
0.63285	0.00781161		0.541396	0.353515	1.17408
0.632927	0.039843	0.039843
0.636028	0.0176885	0.0176885
0.636048	0.00719544		0.259999	0.134016	0.824196
0.636703	0.00655282		0.0149616
0.636788	0.00728133		0.0564517	0.00302787	1.12903
0.637274	0.03695	0.03695
0.638271	0.00538122		0.0681594	0.000152569	1.03584
0.638717	0.0507443	0.0507443
0.640537	0.0329491	0.0329491
0.642035	0.0423328	0.0423328
0.642208	0.0243033	0.0243033
0.642226	0.023541	0.023541
0.642735	0.00695576	0.00695576
0.643131	0.017387	0.017387
0.643875	0.0286404	0.0286404
0.643885	0.0502828	0.0502828
0.6448	0.00456848			0.633817	2.07195
0.645082	0.0387937	0.0387937
0.645753	0.0185199	0.0185199
0.646277	0.0141047	0.0141047
0.64653	0.00844304		0.0937062	0.100799	0.721957
0.647594	0.008518		0.294116	0.20849	1.29912
0.649455	0.00263924		0.281187	0.198703	1.70213
0.649707	0.00841816		0.0926926	0.0395039	0.973812
0.650797	0.0432351	0.0432351
0.651481	0.00648476		0.23874	0.287536	1.37702
0.652287	0.018146	0.018146
0.652635	0.0221512	0.0221512
0.652788	0.00530025	0.00530025
0.653246	0.0146797	0.0146797
0.653428	0.0135466	0.0135466
0.65369	0.031364	0.031364
0.654883	0.00737895	0.00737895
0.654961	0.0231517	0.0231517
0.657043	0.0461157	0.0461157
0.657608	0.0206216	0.0206216
0.659111	0.00125917		0.192669	0.0571691	1.81099
0.660313	0.0174891	0.0174891
0.660374	0.0390982	0.0390982
0.660516	0.0100218	0.0100218
0.662509	0		0.108747	0.107801	0.544076
0.662716	0.00752482			0.265173	2.90036
0.663014	0.00699513		0.0720471	0.153346	0.422144
0.664159	0.0263845	0.0263845
0.666747	0.0225645	0.0225645
0.668334	0.0277801	0.0277801
0.669065	0.006064		0.179524	0.248009	1.35185
0.670278	0.0227463	0.0227463
0.672052	0.00796391	0.00796391
0.672246	0.0343129	0.0343129
0.672334	0.00846692	0.00846692
0.675243	0.0136935	0.0136935
0.675535	0.00574872		0.370302	0.192237	0.642544
0.677963	0.0217987	0.0217987
0.67834	0.00911051	0.00911051
0.67994	0.00294105		0.0979786	0.0152828	1.95957
0.681032	0.00649164	0.00649164
0.681046	0.0165111	0.0165111
0.68134	0.00747393		0.132413	0.200036	2.10998
0.681435	0.0188095	0.0188095
0.685624	0.0184321	0.0184321
0.685782	0.00745388		0.496443	0.204691	0.99507
0.687508	0.0277943	0.0277943
0.688077	0.0130068	0.0130068
0.688151	0.014091	0.014091
0.688362	0.0168158	0.0168158
0.690332	0.0050068		0.230756	0.520298	2.32314
0.690335	0.00761742			0.185073	2.39541
0.692097	0.021323	0.021323
0.692197	0.00648365		0.11306	0.162197	1.68577
0.693069	0.0112797	0.0112797
0.693355	0.0245319	0.0245319
0.696099	0.00156288		0.227176	0.0517529	0.101351
0.696403	0.0119616	0.0119616
0.697681	0.00571173		0.146631	0.0767216	1.0897
0.697937	0.00592047		0.0927588	0.0402471	0.655603
0.698192	0.00368227		0.059921	0.0339792	1.19842
0.698363	0.0271206	0.0271206
0.69877	0.0095965		0.0870784	0.220502	0.823231
0.699304	0.00399227		0.309921	0.139345	1.75625
0.699454	0.00873077		0.0914444	0.129132	0.527441
0.699595	0.0166368	0.0166368
0.699903	0.00238469		0.15739	0.0583111	0.942286
0.700718	0.0191916	0.0191916
0.701803	0.00406912		0.357193	0.116679	6.47698
0.702131	0.0287145	0.0287145
0.704126	0.0122147	0.0122147
0.704373	0.00963154		0.226625	0.0283183	1.7154
0.706773	0.0160216	0.0160216
0.708313	0.0126877	0.0126877
0.708924	0.0135262	0.0135262
0.709687	0.00800627			0.712951	1.8534
0.709854	0.0230299	0.0230299
0.710361	0.0446206	0.0446206
0.711849	0.000192056		0.255596	0.272075	1.70964
0.712218	0.00652324		0.08377	0.12967	0.482823
0.712576	0.0121882	0.0121882
0.712644	0.00944638		0.407881	0.160957	2.16465
0.713631	0.00635043		0.160127	0.212569	1.04701
0.714096	0.00436795		0.102388	0.347984	0.686854
0.714722	0.0185551	0.0185551
0.71526	0.00688806			0.152393	0.852615
0.716493	0.00110641		0.0655274	0.0324644	0.860041
0.717223	0.0224191	0.0224191
0.717549	0.00969128		0.33809	0.22501	1.33098
0.718109	0.0333566	0.0333566
0.718795	0		0.243261	0.0593901	1.73153
0.719254	0.0252357	0.0252357
0.720577	0.00100193		0.17192	0.152032	1.28556
0.724252	0.0042926			0.470562	2.59412
0.724255	0.0311252	0.0311252
0.724499	0.0346398	0.0346398
0.724592	0.00459482		0.148746	0.209283	2.31541
0.725784	0.0193117	0.0193117
0.727498	0.00160607		0.117552	0.0842156	1.29837
0.727573	0.0282128	0.0282128
0.72911	0.00898821			0.400683	3.73306
0.729294	0.00699935		0.112468	0.0810891	0.531898
0.729722	0.0186588	0.0186588
0.730328	0.0134632	0.0134632
0.730763	0.00831819		0.199919
0.730835	0.00374801	0.00374801
0.733534	0.0284182	0.0284182
0.73362	0		0.346434
0.73459	0.0138306	0.0138306
0.735012	0.024962	0.024962
0.736368	0.00805114	0.00805114
0.737658	0.00351961		0.14034	0.236501	0.816491
0.73833	0.0390632	0.0390632
0.738983	0.0325572	0.0325572
0.739174	0.0183571	0.0183571
0.739496	0.0168447	0.0168447
0.739771	0.0321723	0.0321723
0.740771	0.00197062		0.169928	0.161581	0.867535
0.740825	0.00375377		0.091118	0.218519	1.7516
0.741752	0.0135495	0.0135495
0.741799	0.00845844		0.0952687	0.138907	0.703122
0.742256	0.0157555	0.0157555
0.744901	0.0170848	0.0170848
0.744924	0.0222591	0.0222591
0.747391	0.00495368			0.0573177	0.922223
0.749398	0.0247093	0.0247093
0.750889	0.00884038		0.18288	0.133047	0.748509
0.753192	0.0223326	0.0223326
0.753223	0.024601	0.024601
0.754402	0.00828864		0.235751	0.326048	1.3971
0.755642	0.00711279		0.0725562	0.0957356	0.925758
0.756292	0.00831046			0.0867937	3.06128
0.7571	0.0062226		0.0940863	0.173672	0.603431
0.75844	0.0323157	0.0323157
0.759402	0.00976934			0.376149	1.43171
0.76011	0.00180193		0.14181	0.0922935	0.799023
0.760657	0.0264254	0.0264254
0.763645	0.00491586		0.187151	0.0374099	1.40317
0.764138	0.00199201		0.163814	0.060334	1.21682
0.765524	0.0739144	0.0739144
0.766871	0.00868009	0.00868009
0.766979	0.0082676		0.500304	0.088476	1.50807
0.767824	0.0233971	0.0233971
0.76834	0.00727074	0.00727074
0.769067	0.0211705	0.0211705
0.770595	0.0057816	0.0057816
0.770782	0.0116998	0.0116998
0.771505	0.00562862		0.165783	0.0887561	1.04652
0.771798	0.0227907	0.0227907
0.773405	0.00296077		0.18304	0.0838286	0.989304
0.774129	0.0326198	0.0326198
0.774662	0.00804626	0.00804626
0.775454	0.0134771	0.0134771
0.775637	0.00671873		0.0834392	0.134889	0.90618
0.776587	0.0121711	0.0121711
0.776932	0.00275352		0.185749	0.487342	1.57139
0.77876	0.00116303		0.116251	0.0460157	0.755467
0.780923	0.0331036	0.0331036
0.781548	0.0150199	0.0150199
0.781768	0.0098693			0.253905	2.30041
0.784272	0.00230372		0.151427	0.107477	1.17048
0.785033	0.0384454	0.0384454
0.785145	0.00434389		0.167413	0.0470029	0.589436
0.785361	0.00446866		0.109826	0.173975	0.689124
0.786634	0.00943862		0.0878641	0.13938	0.588593
0.786709	0.0309699	0.0309699
0.787717	0.00530769	0.00530769
0.788796	0.00411217		0.352154	0.113911	1.16941
0.789437	0.00687817	0.00687817
0.791029	0.0208313	0.0208313
0.791361	0.0465314	0.0465314
0.791705	0.0306997	0.0306997
0.793903	0.00698903	0.00698903
0.795446	0.00494419		0.0789526	0.0645968	1.2659
0.795523	0.00200192		0.275421	0.354848	2.25046
0.795781	0.00853022	0.00853022
0.796153	0.00528928		0.0412859	0.0412267	0.825717
0.79799	0.00617602		0.192939	0.211695	1.33537
0.798785	0.0035559			0.180335	1.16662
0.799815	0.0236006	0.0236006
0.800194	0.0240139	0.0240139
0.800551	0.00813072		0.267045	0.0122651	4.78664
0.801823	0.017809	0.017809
0.801832	0.0461622	0.0461622
0.802526	0.0319817	0.0319817
0.802628	0.00427976		0.199102	0.127583	1.04673
0.803503	0.0411746	0.0411746
0.804634	0.0180655	0.0180655
0.804674	0.0116613	0.0116613
0.806312	0.0070208	0.0070208
0.806397	0.006714			0.514216	1.76359
0.806563	0.0405671	0.0405671
0.807377	0.00468632			0.244242	1.27428
0.807638	0.00440586		0.0954199	0.145879	0.73713
0.808663	0.0118124	0.0118124
0.808728	0.0216438	0.0216438
0.809109	0.00686369		0.204642	0.289186	2.34023
0.810042	0.022575	0.022575
0.810551	0.0157	0.0157
0.81057	0.0198626	0.0198626
0.811474	0.025905	0.025905
0.811973	0.0172314	0.0172314
0.81205	0.00756184		0.545246	0.14936	3.25295
0.812265	0.0298417	0.0298417
0.814411	0.00247039		0.054301	0.0191865	0.811538
0.815328	0.0046055		0.2069	0.254293	1.38573
0.817926	0.0214616	0.0214616
0.818382	0.00567393	0.00567393
0.819122	0.0223439	0.0223439
0.81953	0.0353236	0.0353236
0.819584	0.0435708	0.0435708
0.820777	0.0499006	0.0499006
0.820847	0.00543741		0.273508	0.322693	1.29605
0.825056	0.00655232	0.00655232
0.825178	0.0396488	0.0396488
0.825626	0.00628296		0.15656	0.297751	1.13118
0.825796	0.00266411		0.125894	0.0623498	1.10402
0.826457	0.0159278	0.0159278
0.82667	0.00213016		0.211095	0.46897	1.06818
0.826775	0.00713028	0.00713028
0.827689	0.0105763	0.0105763
0.828184	0.00671679		0.137848	0.135206	1.05458
0.829211	0.00212769		0.261988	0.0772709	0.984236
0.831087	0.0057799		0.0349232	0.0241826	0.743675
0.831657	0.00901622		0.24756	0.205772	2.25703
0.832255	0.00670139	0.00670139
0.832673	0.00956887			0.0520445	1.12172
0.832992	0.00490062		0.0478472	0.0424035	0.533607
0.834611	0.0222178	0.0222178
0.835327	0.0117285	0.0117285
0.835881	0.00446239		0.079459	0.0531869	1.27727
0.838896	0.0074521	0.0074521
0.840842	0.0118589	0.0118589
0.841982	0.00195284		0.127886	0.0511555	0.903388
0.845627	0.00696758		0.845627	1.25042	3.01184
0.847447	0.00136892		0.122855	0.228227	0.668963
0.847835	0.0228288	0.0228288
0.848498	0.00517548		0.0913978	0.210489	0.758942
0.848589	0.00594528	0.00594528
0.848718	0.0166408	0.0166408
0.849791	0.00460333		0.120497	0.0483494	1.23381
0.851281	0.0209534	0.0209534
0.851288	0.0465544	0.0465544
0.853118	0.00400367		0.280731	0.04056	0.958142
0.856416	0.0634343	0.0634343
0.856742	0.0120375	0.0120375
0.856996	0.0252541	0.0252541
0.859637	0.00845845	0.00845845
0.8598	0.0245972	0.0245972
0.859897	0.0472205	0.0472205
0.860208	0.0344662	0.0344662
0.860258	0.00343219		0.114423	0.0837713	2.28845
0.860385	0.00363038	0.00363038
0.86112	0.00395327		0.163439	0.157183	1.04913
0.861597	0.0458743	0.0458743
0.862544	0.00617194		0.0599164
0.863713	0.00387818		0.0867807	0.157007	0.567731
0.864111	0.00257466		0.226481	0.0565529	1.03183
0.864232	0.0272345	0.0272345
0.86489	0.0086971	0.0086971
0.865333	0.0325017	0.0325017
0.865488	0.0021653		0.167296	0.0808728	1.13623
0.866119	0.00627054		0.164316	0.186882	0.62822
0.866317	0.00290274		0.2036	0.218557	2.63454
0.867021	0.00813121		0.0803869	0.151609	0.506026
0.868257	0.0439479	0.0439479
0.868641	0.0540507	0.0540507
0.869515	0.0286171	0.0286171
0.870352	0.0101733	0.0101733
0.871274	0.00175693		0.145869	0.113328	1.23401
0.87192	0.021254	0.021254
0.873396	0.00220974		0.0759721	0.0871433	1.18293
0.873412	0.0381261	0.0381261
0.873863	0.0282198	0.0282198
0.874505	0.00465096		0.0142468	0.0614747	0.998367
0.875871	0.00175138		0.0338889	0.00402923	0.677778
0.87663	0.0302119	0.0302119
0.876848	0.00269989		0.136023	0.0791616	1.57536
0.878308	0.00252698		0.0525116	0.00274258	1.05023
0.878395	0.0253525	0.0253525
0.879008	0.0108103	0.0108103
0.879249	0.0121494	0.0121494
0.880901	0.043061	0.043061
0.881492	0.00677069	0.00677069
0.886876	0.0149205	0.0149205
0.886903	0.00207014		0.146132	0.0563806	1.48314
0.887362	0.0106262	0.0106262
0.888725	0.00282938		0.061257	0.0138537	0.871007
0.888878	0.00854603		0.113241	0.0194999	1.79862
0.889113	0.00184672		0.120345	0.0148808	1.09284
0.889564	0.0205146	0.0205146
0.890577	0.0246058	0.0246058
0.891827	0.0180819	0.0180819
0.892189	0.0272941	0.0272941
0.893604	0.00687102		0.315974	0.0611864	1.53941
0.894476	0.00325047		0.109115	0.111894	0.693026
0.896202	0.0226169	0.0226169
0.897944	0.0185004	0.0185004
0.898157	0.00736108	0.00736108
0.898383	0.00601893		0.594625	0.397721	1.73817
0.89843	0.0193354	0.0193354
0.898594	0.00494262	0.00494262
0.898885	0.0053058		0.213104	0.212696	0.901872
0.899905	0.00130393		0.711072
0.900467	0.00417789		0.0506769	0.00850892	1.01354
0.900812	0.00846481		0.022504	0.083286	0.167685
0.901468	0.0050509		0.0376192
0.901496	0.00446955	0.00446955
0.902015	0.00804998		0.269166	0.119145	1.13934
0.904958	0.00277289		0.0849824	0.0787357	1.69965
0.905564	0.00230121		0.126804	0.1075	0.691593
0.905628	0.0319396	0.0319396
0.905915	0.00940437			0.197219	2.21301
0.906309	0.00773192		0.68499	0.458404	2.3254
0.907214	0.00933803		0.156325	0.0249638	0.801785
0.910766	0.0361297	0.0361297
0.912189	0.00257839	0.00257839
0.913228	0.0127093	0.0127093
0.915325	0.00741909	0.00741909
0.915563	0.0376194	0.0376194
0.917999	0.011365	0.011365
0.919491	0.0655165	0.0655165
0.919619	0.0609064	0.0609064
0.920066	0.0212007	0.0212007
0.921206	0.005819		0.0541857	0.180685	0.51454
0.921269	0.00506153		0.0882765	0.0341833	0.795538
0.922314	0.00503232		0.240974	0.106713	0.884449
0.922603	0.0208182	0.0208182
0.924092	0.0283229	0.0283229
0.925075	0.00914202	0.00914202
0.925078	0.0257038	0.0257038
0.925638	0.00479969		0.395938	0.685544	3.49584
0.926315	0.00552609		0.429955
0.92632	0.00992536	0.00992536
0.926467	0.0129854	0.0129854
0.927367	0.0099445	0.0099445
0.929089	0.00556562		0.292301	0.358184	1.19271
0.929639	0.00809664	0.00809664
0.929741	0.0248553	0.0248553
0.93018	0.00428934	0.00428934
0.931605	0.0163755	0.0163755
0.93222	0.00391257		0.147948	0.0365251	1.21481
0.932569	0.0102469	0.0102469
0.932915	0.0121816	0.0121816
0.933539	0.00824455	0.00824455
0.933931	0.061845	0.061845
0.935978	0.00287015			0.0657181	1.03123
0.936418	0.00659495		0.047599
0.93707	0.0148771	0.0148771
0.937431	0.0567254	0.0567254
0.937749	0.00296583		0.0716301	0.183672	1.17
0.938157	0.00236298	0.00236298
0.938227	0.00400511		0.286746	0.485621	1.21057
0.938484	0.0366951	0.0366951
0.938763	0.0318416	0.0318416
0.939008	0.00946939		0.239554	0.109832	1.62997
0.939292	0.019847	0.019847
0.939412	0.00245934		0.0506871	0.0117695	0.463051
0.940358	0.00455309	0.00455309
0.942087	0.0241992	0.0241992
0.9439	0.0236154	0.0236154
0.944712	0.01017	0.01017
0.944907	0.00255344		0.0785907	0.00917568	1.20955
0.946695	0.00940294		0.0854269	0.0149114	0.86886
0.947872	0.0136089	0.0136089
0.9483	0.0064111	0.0064111
0.948634	0.00255096		0.137449	0.0383718	0.942755
0.948933	0.0057465		0.371225	0.256718	2.46569
0.949094	0.00603342			0.354512	1.34556
0.949718	0.00805893	0.00805893
0.950606	0.00754245	0.00754245
0.951325	0.0199121	0.0199121
0.952342	0.0188037	0.0188037
0.953379	0.00931396		0.10488	0.112738	0.510939
0.953872	0.00678497		0.128246	0.263539	0.864991
0.954088	0.00644868	0.00644868
0.955424	0.00445719		0.0917104	0.109746	0.561137
0.956417	0.00542399		0.142006	0.0339799	0.914557
0.95642	0.00368558		0.15843	0.100243	2.86809
0.960148	0.0302467	0.0302467
0.961211	0.00275643		0.187805	0.0920931	1.26107
0.961526	0.0233547	0.0233547
0.961768	0.0265551	0.0265551
0.96203	0.013308	0.013308
0.962306	0.019008	0.019008
0.96263	0.0140861	0.0140861
0.963269	0.00442634		0.15416	0.0618067	2.73301
0.963569	0.023167	0.023167
0.964099	0.0059695		0.204697	0.38766	1.71406
0.96462	0.0457531	0.0457531
0.965145	0.0214869	0.0214869
0.965871	0.0268326	0.0268326
0.966331	0.00968175		0.184563	0.340259	2.69431
0.966401	0.00878495		0.318807	0.076288	1.15081
0.968628	0.00564744		0.248051	0.0733853	3.07284
0.969082	0.0214063	0.0214063
0.96953	0.00956998	0.00956998
0.970146	0.00345149	0.00345149
0.970423	0.00430291		0.471976	0.581043	1.27966
0.970631	0.005764		0.181835
0.973517	0.00715402		0.145334	0.08422	1.11038
0.974077	0.00665041		0.262228	0.0910011	1.70852
0.974179	0.014501	0.014501
0.974923	0.00439301		0.139042	0.0605216	1.19196
0.978966	0.0098808			0.766649	1.72754
0.978978	0.0042405		0.11651	0.0114445	0.956982
0.979436	0.0188687	0.0188687
0.979961	0.00112161		0.0908479	0.0224997	1.11875
0.979989	0.0078581	0.0078581
0.981748	0.00507143		0.060479	0.0230536	0.806415
0.9825	0.0264453	0.0264453
0.983015	0.0375675	0.0375675
0.984613	0.0148548	0.0148548
0.986365	0.00683704		0.159473	0.125907	1.67848
0.990437	0.00262715		0.124949	0.0157063	1.3339
0.994235	0.00930897	0.00930897
0.994748	0.0222676	0.0222676
0.994983	0.0159737	0.0159737
0.997619	0.00368697		0.103144	0.0761218	0.848489
0.997771	0.0035701	0.0035701
0.999511	0.0212835	0.0212835
0.999925	0.00462777		0.840608	0.769734	3.24823
1.00024	0.0282552	0.0282552
1.00053	0.0276227	0.0276227
1.00095	0.00452397	0.00452397
1.00112	0.00476178		0.114215	0.0411301	0.94432
1.00168	0.000993178		0.237539	0.113429	1.49462
1.0025	0.00257003		0.0486245
1.00261	0.0149415	0.0149415
1.00424	0.014666	0.014666
1.00492	0.00805152			0.206686	2.0565
1.00863	0.0040107		0.155514	0.0632863	2.60192
1.00945	0.00777979	0.00777979
1.00966	0.00592345		0.12381
1.01032	0.0131524	0.0131524
1.0111	0.0335005	0.0335005
1.01184	0.00362185		0.0861979
1.01195	0.00311712		0.074198	0.154426	0.524212
1.01218	0.0166198	0.0166198
1.01235	0.029783	0.029783
1.01307	0.0223251	0.0223251
1.01667	0.025722	0.025722
1.01762	0.00681388		0.0543465
1.01762	0.0344508	0.0344508
1.01803	0.000258723		0.146758	0.076503	2.53597
1.01992	0.0175177	0.0175177
1.02124	0.00316247		0.266843	0.0951536	1.05863
1.02161	0.00642712		0.0992974	0.0286195	0.83245
1.02363	0.00450452		0.224844	0.290449	1.34423
1.02402	0.00262359		0.0918033	0.0283884	1.63668
1.02478	0.00572257		0.640615	0.247998	0.323967
1.03398	0.0254335	0.0254335
1.03714	0.0127079	0.0127079
1.03757	0.00215383		0.132002	0.180727	0.878172
1.03781	0.00886009		0.830163	0.198873	1.70936
1.03835	0.00929445			0.227836	1.06597
1.0387	0.026252	0.026252
1.03892	0.00431176		0.0725843	0.129918	0.276628
1.03905	0.00466764		0.0641298
1.03957	0.012004	0.012004
1.04122	0.00969898		0.140413	0.150338	0.833947
1.04177	0.0225277	0.0225277
1.04258	0.00322227		0.213364	0.0278169	1.00445
1.04329	0.0112226	0.0112226
1.04406	0.01299	0.01299
1.04434	0.0279854	0.0279854
1.04482	0.0129282	0.0129282
1.04491	0.00621192		0.0649451
1.04497	0.0468423	0.0468423
1.04538	0.0109247	0.0109247
1.04682	0.00256352		0.0654368	0.0184188	0.828403
1.04768	0.0219149	0.0219149
1.04769	0.00139546		0.221021	0.377138	2.36309
1.04919	0.00419567		0.0480719	0.0113221	0.961439
1.04969	0.0158344	0.0158344
1.04982	0.00686769		0.0521978
1.05013	0.000814666		0.0937094	0.0730041	1.00597
1.05121	0.0265629	0.0265629
1.05359	0.00583111		0.0672284	0.103823	0.725346
1.05412	0.00801615		0.10074	0.156214	0.515758
1.05636	0.00498057		0.235517	0.227897	1.51244
1.05677	0.00146123		0.420721	0.3035	1.61877
1.06138	0.00636121		0.00281893	0.00677342	0.0563786
1.06368	0.0134829	0.0134829
1.06466	0.012552	0.012552
1.06508	0.0554821	0.0554821
1.06513	0.00975276		0.41567	0.459524	2.54202
1.06548	0.00570398		0.11006	0.0323019	0.810739
1.06687	0.00416016		0.0420889	0.0291528	0.274877
1.06899	0.0275044	0.0275044
1.07052	0.0338567	0.0338567
1.07271	0.00584365		0.0986336
1.07412	0.00560253	0.00560253
1.07417	0.00319175		0.258843	0.251595	1.48632
1.07488	0.00797267		0.761588	0.157235	0.50391
1.07498	0.00407267		0.267599
1.07521	0.00910803		0.128517	0.0864625	0.735883
1.07856	0.00353584		0.0768807
1.07896	0.0123147	0.0123147
1.07921	0.0042025		0.171992	0.0961717	3.09541
1.07953	0.0138926	0.0138926
1.08146	0.00621203		0.01598
1.08194	0.0190304	0.0190304
1.08486	0.00637394		0.0356724
1.08508	0.00792683		0.103333	0.0654674	0.691289
1.0853	0.00886845	0.00886845
1.08631	0.00399938	0.00399938
1.0871	0.0029652		0.555608	0.346624	1.10754
1.08754	0.0127851	0.0127851
1.0898	0.00643379		0.0149231	0.143272	0.698399
1.09073	0.00652543		0.278679
1.09075	0.019499	0.019499
1.09105	0.00450541		0.0484724
1.0929	0.00619622		0.0923304
1.09503	0.00615734		0.0474571
1.09527	0.00456071		0.104836
1.09734	0.00203946		0.0472102
1.09734	0.000301126		0.13094	0.227206	0.302414
1.0976	0.140177	0.140177
1.09773	0.00163986		0.0500364
1.09897	0.00440648		0.044433
1.09937	0.00598357		0.142945
1.09995	0.0131554	0.0131554
1.10066	0.0176261	0.0176261
1.10164	0.00807329		0.15673
1.10311	0.00600898		0.204226
1.104	0.00165213		0.0571835
1.10425	0.00265926		0.00690788
1.10444	0.0106023	0.0106023
1.1052	0.00471079		0.0676301
1.10541	0.00309413		0.535192	0.513024	5.53058
1.10579	0.00483603		0.0207122
1.10631	0.00188204		0.0394413
1.10693	0.00627359		0.148639
1.10708	0.000224673		0.0984449
1.10715	0.00168072		0.0407406
1.10805	0.000953814		0.172072
1.10979	0.0101004	0.0101004
1.11022	0.00518935		0.0488404
1.11042	0.00561884		0.0568277
1.11061	0.00488282		0.181525
1.11082	0.0237239	0.0237239
1.1116	0.0252908	0.0252908
1.11182	0.00533434		0.279144
1.11188	0.00511837			0.261626	0.663714
1.11301	0.00694207		0.0338006
1.13554	0.0248256	0.0248256
1.27817	0.00884565		0.565523	0.242821	2.89445
1.35147	0.00598028		0.445165	0.182126	2.71312
1.54244	0.0289387	0.0289387

## Sheet: G49286
Sun, Z., et al., 2021, Formation of low-gradient bedrock chutes by dry rockfall on planetary surfaces: Geology, https://doi.org/10.1130/G49286.1
